# Supplementary material
Source: Springer Nature journal article supplement (https://www.springermedizin.de/resource/supplementary/12881_2007_303_MOESM2_ESM.pdf/9453058)

Pairwise R<sup>2</sup>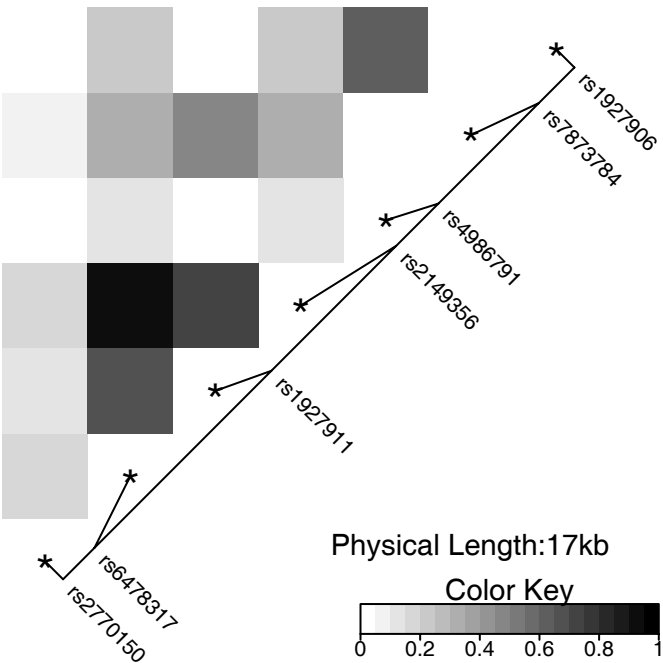

Pairwise D'

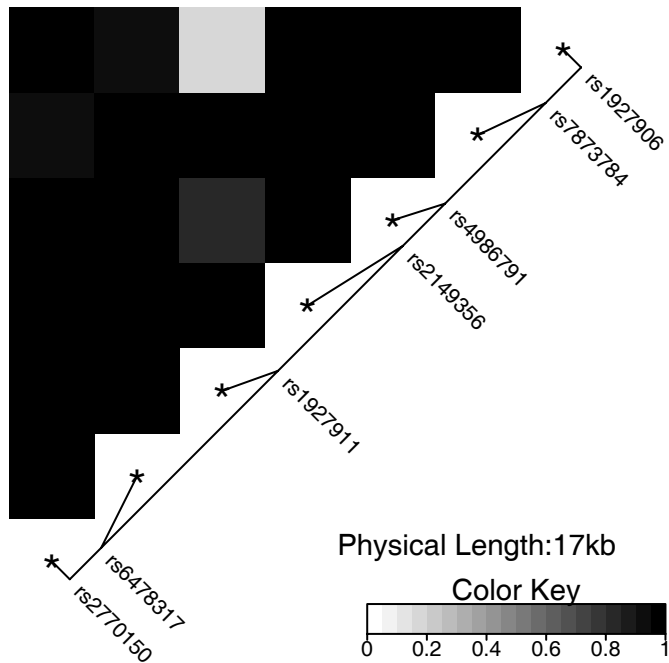

Supplement: MOESM2 [file 9453058]
